# Supplementary material for: Anticancer activity of a new copper(ii) complex with a hydrazone ligand. Structural and spectroscopic characterization, computational simulations and cell mechanistic studies on 2D and 3D breast cancer cell models
Source: Royal Society of Chemistry journal article supplement (doi:10.1039/d1dt00869b), 2021-01-01

**Anticancer activity of a new copper (II) complex with a hydrazone ligand.  
Structural and spectroscopic characterization, computational simulations and cell  
mechanistic studies on 2D and 3D breast cancer cell models**

Lucia M. Balsa<sup>1</sup>, Verónica Ferraresi-Curotto<sup>2\*</sup>, Martin J. Lavecchia<sup>1</sup>, Gustavo A. Echeverría<sup>2</sup>, Oscar E. Piro<sup>2</sup>, Javier García-Tojal<sup>3</sup>, Reinaldo Pis-Diez<sup>1</sup>, Ana C. González-Baró<sup>1</sup>, Ignacio E. León<sup>1\*</sup>

<sup>1</sup> Centro de Química Inorgánica (CEQUINOR, CONICET-UNLP), Facultad de Ciencias Exactas, Universidad Nacional de La Plata, Bv 120 1465, 1900 La Plata, Argentina

<sup>2</sup> Instituto de Física La Plata (IFLP, CONICET-UNLP), CC 67, B1900AVV, La Plata, Argentina

<sup>3</sup> Departamento de Química, Universidad de Burgos, Plaza Misael Bañuelos s/n, 09001 Burgos, Spain

\* [ileon@biol.unlp.edu.ar](mailto:ileon@biol.unlp.edu.ar), [vfc@fisica.unlp.edu.ar](mailto:vfc@fisica.unlp.edu.ar)

**Supplementary Material**

**Table S1.** Full bond lengths [Å] and angles [°] for [Cu(HL)(H<sub>2</sub>O)<sub>2</sub>].NO<sub>3</sub>.

| Bond lengths [Å] |          |             |          |
|------------------|----------|-------------|----------|
| C(1)-C(6)        | 1.407(4) | C(11)-C(12) | 1.381(4) |
| C(1)-C(2)        | 1.409(4) | C(12)-C(13) | 1.385(5) |
| C(1)-C(8)        | 1.440(4) | C(13)-O(3)  | 1.348(4) |
| C(2)-O(1)        | 1.319(3) | C(13)-C(14) | 1.385(5) |
| C(2)-C(3)        | 1.422(4) | C(14)-C(15) | 1.375(4) |
| C(3)-O(4)        | 1.370(4) | C(16)-O(3)  | 1.432(5) |
| C(3)-C(4)        | 1.376(4) | N(1)-N(2)   | 1.384(3) |
| C(4)-C(5)        | 1.391(5) | N(1)-Cu     | 1.930(2) |
| C(5)-C(6)        | 1.364(5) | O(1)-Cu     | 1.889(2) |
| C(7)-O(4)        | 1.417(4) | O(2)-Cu     | 1.966(2) |
| C(8)-N(1)        | 1.286(4) | O(1W)-Cu    | 2.318(2) |
| C(9)-O(2)        | 1.256(3) | O(2W)-Cu    | 1.975(2) |
| C(9)-N(2)        | 1.343(4) | N(3)-O(33)  | 1.187(4) |
| C(9)-C(10)       | 1.471(3) | N(3)-O(32)  | 1.232(4) |
| C(10)-C(15)      | 1.392(4) | N(3)-O(31)  | 1.249(4) |
| C(10)-C(11)      | 1.395(4) |             |          |

| Bond angles [°]   |          |                   |           |
|-------------------|----------|-------------------|-----------|
| C(6)-C(1)-C(2)    | 119.8(3) | C(12)-C(13)-C(14) | 119.7(3)  |
| C(6)-C(1)-C(8)    | 116.9(3) | C(15)-C(14)-C(13) | 120.4(3)  |
| C(2)-C(1)-C(8)    | 123.3(2) | C(14)-C(15)-C(10) | 120.8(3)  |
| O(1)-C(2)-C(1)    | 125.7(2) | C(8)-N(1)-N(2)    | 120.0(2)  |
| O(1)-C(2)-C(3)    | 116.7(2) | C(8)-N(1)-Cu      | 128.1(2)  |
| C(1)-C(2)-C(3)    | 117.6(2) | N(2)-N(1)-Cu      | 111.9(2)  |
| O(4)-C(3)-C(4)    | 125.3(3) | C(9)-N(2)-N(1)    | 114.5(2)  |
| O(4)-C(3)-C(2)    | 113.4(2) | C(2)-O(1)-Cu      | 126.1(2)  |
| C(4)-C(3)-C(2)    | 121.3(3) | C(9)-O(2)-Cu      | 113.3(2)  |
| C(3)-C(4)-C(5)    | 120.0(3) | C(13)-O(3)-C(16)  | 118.0(3)  |
| C(6)-C(5)-C(4)    | 120.3(3) | C(3)-O(4)-C(7)    | 118.6(3)  |
| C(5)-C(6)-C(1)    | 121.0(3) | O(1)-Cu-N(1)      | 93.51(9)  |
| N(1)-C(8)-C(1)    | 123.1(2) | O(1)-Cu-O(2)      | 174.44(8) |
| O(2)-C(9)-N(2)    | 119.1(2) | N(1)-Cu-O(2)      | 81.10(9)  |
| O(2)-C(9)-C(10)   | 120.4(2) | O(1)-Cu-O(2W)     | 91.61(9)  |
| N(2)-C(9)-C(10)   | 120.4(2) | N(1)-Cu-O(2W)     | 158.4(1)  |
| C(15)-C(10)-C(11) | 118.3(2) | O(2)-Cu-O(2W)     | 92.93(9)  |
| C(15)-C(10)-C(9)  | 118.1(2) | O(1)-Cu-O(1W)     | 90.75(9)  |
| C(11)-C(10)-C(9)  | 123.5(3) | N(1)-Cu-O(1W)     | 107.75(9) |
| C(12)-C(11)-C(10) | 121.0(3) | O(2)-Cu-O(1W)     | 92.20(9)  |
| C(13)-C(12)-C(11) | 119.8(3) | O(2W)-Cu-O(1W)    | 93.1(1)   |
| O(3)-C(13)-C(12)  | 124.8(3) | O(33)-N(3)-O(32)  | 119.1(4)  |
| O(3)-C(13)-C(14)  | 115.5(3) | O(33)-N(3)-O(31)  | 119.7(3)  |
|                   |          | O(32)-N(3)-O(31)  | 121.1(3)  |

**Table S2.** Atomic coordinates (x 104) and equivalent isotropic displacement parameters ( $\text{\AA}^2$  x 103) for  $[\text{Cu}(\text{HL})(\text{H}_2\text{O})_2]\cdot\text{NO}_3$ .  $U(\text{eq})$  is defined as one third of the trace of the orthogonalized  $U_{ij}$  tensor.

| atom | x       | y       | z       | $U(\text{eq})$ |
|------|---------|---------|---------|----------------|
| C(1) | 4235(4) | 3246(3) | 7176(2) | 41(1)          |
| C(2) | 5163(4) | 1979(3) | 7545(2) | 40(1)          |
| C(3) | 5890(4) | 1246(3) | 6758(2) | 44(1)          |
| C(4) | 5758(5) | 1765(3) | 5668(2) | 52(1)          |
| C(5) | 4864(5) | 3023(3) | 5321(2) | 58(1)          |
| C(6) | 4094(5) | 3745(3) | 6059(2) | 52(1)          |
| C(7) | 7474(7) | -810(4) | 6495(3) | 75(1)          |

|       |         |         |          |        |
|-------|---------|---------|----------|--------|
| C(8)  | 3430(4) | 4091(2) | 7886(2)  | 41(1)  |
| C(9)  | 3035(4) | 4203(2) | 10589(2) | 41(1)  |
| C(10) | 2265(4) | 5018(2) | 11359(2) | 42(1)  |
| C(11) | 1514(4) | 6307(3) | 11034(2) | 47(1)  |
| C(12) | 846(4)  | 7029(3) | 11791(3) | 51(1)  |
| C(13) | 887(4)  | 6468(3) | 12893(3) | 50(1)  |
| C(14) | 1616(5) | 5187(3) | 13227(3) | 57(1)  |
| C(15) | 2317(5) | 4474(3) | 12468(3) | 52(1)  |
| C(16) | -562(5) | 8399(4) | 13410(4) | 70(1)  |
| N(1)  | 3513(3) | 3763(2) | 8916(2)  | 39(1)  |
| N(2)  | 2727(3) | 4628(2) | 9548(2)  | 42(1)  |
| O(1)  | 5429(3) | 1408(2) | 8561(2)  | 49(1)  |
| O(2)  | 3976(3) | 3098(2) | 10900(2) | 50(1)  |
| O(1W) | 2279(3) | 1005(2) | 10595(2) | 53(1)  |
| O(3)  | 277(4)  | 7081(2) | 13700(2) | 65(1)  |
| O(2W) | 6780(4) | 879(2)  | 10517(2) | 62(1)  |
| O(4)  | 6724(4) | 20(2)   | 7196(2)  | 58(1)  |
| Cu    | 4741(1) | 2158(1) | 9758(1)  | 45(1)  |
| N(3)  | 7943(4) | 2278(2) | 12271(2) | 54(1)  |
| O(31) | 9054(4) | 2830(3) | 11473(2) | 80(1)  |
| O(32) | 7864(7) | 1179(3) | 12378(3) | 107(1) |
| O(33) | 6878(8) | 2833(4) | 12913(3) | 127(2) |

**Table S3.** Anisotropic displacement parameters ( $\text{\AA}^2 \times 10^3$ ) for  $[\text{Cu}(\text{HL})(\text{H}_2\text{O})_2]\cdot\text{NO}_3$ . The anisotropic displacement factor exponent takes the form:  $-2\pi^2 [h^2 a^{*2} U^{11} + \dots + 2 h k a^* b^* U^{12}]$ .

| atom | $U^{11}$ | $U^{22}$ | $U^{33}$ | $U^{23}$ | $U^{13}$ | $U^{12}$ |
|------|----------|----------|----------|----------|----------|----------|
| C(1) | 43(1)    | 41(1)    | 38(1)    | -11(1)   | -4(1)    | -11(1)   |
| C(2) | 46(1)    | 40(1)    | 37(1)    | -11(1)   | -5(1)    | -13(1)   |
| C(3) | 52(1)    | 42(1)    | 41(1)    | -14(1)   | -6(1)    | -11(1)   |
| C(4) | 60(2)    | 59(2)    | 38(1)    | -21(1)   | -4(1)    | -10(1)   |
| C(5) | 70(2)    | 64(2)    | 34(1)    | -9(1)    | -9(1)    | -7(2)    |

|       |        |       |        |        |        |        |
|-------|--------|-------|--------|--------|--------|--------|
| C(6)  | 60(2)  | 49(2) | 41(1)  | -6(1)  | -10(1) | -4(1)  |
| C(7)  | 113(3) | 52(2) | 63(2)  | -32(2) | -9(2)  | -6(2)  |
| C(8)  | 46(1)  | 34(1) | 41(1)  | -8(1)  | -8(1)  | -5(1)  |
| C(9)  | 49(1)  | 34(1) | 44(1)  | -14(1) | -8(1)  | -10(1) |
| C(10) | 47(1)  | 35(1) | 48(1)  | -19(1) | -7(1)  | -7(1)  |
| C(11) | 52(1)  | 38(1) | 51(2)  | -14(1) | -9(1)  | -7(1)  |
| C(12) | 52(1)  | 35(1) | 67(2)  | -22(1) | -8(1)  | -2(1)  |
| C(13) | 46(1)  | 50(2) | 62(2)  | -31(1) | -7(1)  | -9(1)  |
| C(14) | 72(2)  | 53(2) | 49(2)  | -19(1) | -16(1) | -4(1)  |
| C(15) | 67(2)  | 39(1) | 52(2)  | -16(1) | -15(1) | -4(1)  |
| C(16) | 61(2)  | 62(2) | 99(3)  | -53(2) | -9(2)  | -2(2)  |
| N(1)  | 46(1)  | 31(1) | 42(1)  | -13(1) | -6(1)  | -6(1)  |
| N(2)  | 51(1)  | 31(1) | 44(1)  | -15(1) | -8(1)  | 0(1)   |
| O(1)  | 79(1)  | 33(1) | 34(1)  | -12(1) | -12(1) | -4(1)  |
| O(2)  | 74(1)  | 33(1) | 44(1)  | -16(1) | -16(1) | 1(1)   |
| O(1W) | 62(1)  | 42(1) | 48(1)  | -13(1) | -4(1)  | -6(1)  |
| O(3)  | 71(1)  | 63(1) | 71(2)  | -43(1) | -7(1)  | -6(1)  |
| O(2W) | 89(2)  | 39(1) | 63(1)  | -20(1) | -35(1) | 8(1)   |
| O(4)  | 89(2)  | 39(1) | 47(1)  | -19(1) | -11(1) | -6(1)  |
| Cu    | 68(1)  | 29(1) | 38(1)  | -13(1) | -13(1) | -3(1)  |
| N(3)  | 68(2)  | 45(1) | 43(1)  | -13(1) | -15(1) | 6(1)   |
| O(31) | 79(2)  | 69(2) | 62(2)  | -3(1)  | -2(1)  | 10(1)  |
| O(32) | 167(4) | 51(2) | 106(3) | -15(2) | -53(3) | -9(2)  |
| O(33) | 174(4) | 92(2) | 90(3)  | -48(2) | 48(3)  | -22(3) |

**Table S4.** Hydrogen coordinates ( $\times 10^4$ ) and isotropic displacement parameters ( $\text{\AA}^2 \times 10^3$ ) for  $[\text{Cu}(\text{HL})(\text{H}_2\text{O})_2]\cdot\text{NO}_3$ .

| atom  | x    | y     | z    | U(eq) |
|-------|------|-------|------|-------|
| H(4)  | 6267 | 1273  | 5163 | 62    |
| H(5)  | 4790 | 3374  | 4582 | 70    |
| H(6)  | 3467 | 4580  | 5821 | 63    |
| H(7A) | 6428 | -829  | 6151 | 113   |
| H(7B) | 7954 | -1639 | 6918 | 113   |

|        |          |          |           |         |
|--------|----------|----------|-----------|---------|
| H(7C)  | 8546     | -524     | 5941      | 113     |
| H(8)   | 2822     | 4913     | 7586      | 49      |
| H(11)  | 1462     | 6686     | 10296     | 56      |
| H(12)  | 370      | 7890     | 11561     | 61      |
| H(14)  | 1630     | 4807     | 13968     | 69      |
| H(15)  | 2832     | 3618     | 12700     | 63      |
| H(16A) | 375      | 8822     | 12851     | 105     |
| H(16B) | -858     | 8728     | 14047     | 105     |
| H(16C) | -1766    | 8531     | 13137     | 105     |
| H(2)   | 2092     | 5377     | 9294      | 51      |
| H(1A)  | 1250(40) | 1510(30) | 10820(30) | 69(12)  |
| H(1B)  | 2700(50) | 500(30)  | 11168(17) | 57(10)  |
| H(2A)  | 7140(70) | 890(40)  | 11090(20) | 89(15)  |
| H(2B)  | 7140(80) | 131(19)  | 10450(40) | 102(18) |

**Table S5.** Hydrogen bond distances and angles in  $[\text{Cu}(\text{HL})(\text{H}_2\text{O})_2]\cdot\text{NO}_3$ .

| D-H     | d(D-H)  | d(H..A) | $\angle(\text{D-H..A})$ | d(D..A)  | A   | Symmetry operation   |
|---------|---------|---------|-------------------------|----------|-----|----------------------|
| N2-H2   | 0.86    | 2.03    | 171.8                   | 2.886(3) | O31 | $[-x+1, -y+1, -z+2]$ |
| O1W-H1A | 0.85(1) | 2.06(1) | 171(4)                  | 2.903(3) | O31 | $[x-1, y, z]$        |
| O1W-H1B | 0.85(1) | 2.21(2) | 132(3)                  | 2.847(3) | O1  | $[-x+1, -y, -z+2]$   |
| O1W-H1B | 0.85(1) | 2.14(2) | 156(3)                  | 2.936(3) | O4  | $[-x+1, -y, -z+2]$   |
| O2W-H2A | 0.85(1) | 1.99(1) | 172(4)                  | 2.839(5) | O32 |                      |

**Table S6.** Complete IR and Raman spectra of  $\text{H}_2\text{L}$  and  $[\text{Cu}(\text{HL})(\text{H}_2\text{O})_2]\cdot\text{NO}_3$ .

| $\text{H}_2\text{L}$ |       |                          | $[\text{Cu}(\text{HL})(\text{H}_2\text{O})_2]^+$ |       |            |                                         |
|----------------------|-------|--------------------------|--------------------------------------------------|-------|------------|-----------------------------------------|
| IR                   | Raman | Assignment               | IR                                               | Raman | Calculated | Assignment                              |
| 3571 m               |       | $\nu \text{H}_2\text{O}$ | 3396 m,b                                         |       |            | $\nu \text{H}_2\text{O}_{\text{coord}}$ |
| 3213 m               |       | $\nu \text{NH}$          | 3178 w,b                                         |       | 3539       | $\nu \text{NH}$                         |
| 3006 vw              |       | $\nu \text{OH}$          | —                                                |       |            | $\nu \text{OH}$                         |
| 3102 w               |       | $\nu \text{CHip MeBH}$   | 3114 vw                                          |       | 3232       | $\nu \text{CHip MeBH}$                  |
| 3080 w               | 3083  | $\nu \text{CHip oVa}$    | 3087                                             |       | 3217       | $\nu \text{CHip oVa}$                   |

|            |          |                                                                                                  |         |         |              |                                                                                              |
|------------|----------|--------------------------------------------------------------------------------------------------|---------|---------|--------------|----------------------------------------------------------------------------------------------|
|            |          |                                                                                                  |         |         |              |                                                                                              |
| 2929 vw    |          | $\nu_{as} \text{CH}_3 \text{ MeBH}$                                                              | 3075 vw |         | 3160/3090    | $\nu_{as} \text{CH}_3 \text{ MeBH}$                                                          |
| 2951 vw    |          | $\nu_{as} \text{CH}_3 \text{ oVa}$                                                               | 2985 vw |         | 3142/5056    | $\nu_{as} \text{CH}_3 \text{ oVa}$                                                           |
| 2833 vw    |          | $\nu \text{C8H}$                                                                                 | 2948 vw |         | 3030         | $\nu \nu \text{C8H}$                                                                         |
|            |          |                                                                                                  | 2888    |         | 3025         | $\nu_s \text{CH}_3 \text{ MeBH}$                                                             |
| 2847 vw    |          | $\nu_s \text{CH}_3 \text{ oVa}$                                                                  | 2855    |         | 3001         | $\nu_s \text{CH}_3 \text{ oVa}$                                                              |
|            |          |                                                                                                  | 1767 vw |         |              | $\nu_1 + \nu_4 \text{NO}_3^-$                                                                |
| 1650 s     | 1660 w   | $\nu \text{C=O}$                                                                                 |         |         |              |                                                                                              |
| 1608 s (b) | 1610 vs  | $\nu \text{C=N}$                                                                                 | 1607 s  | 1609 vs | 1688         | $\nu \text{C=N} + \nu \text{C=O} + \nu \text{ring oVa}$                                      |
|            |          |                                                                                                  | 1590 w  | 1590 sh | 1666         | $\nu \text{ring MeBH} + \text{Ar-C}$                                                         |
| 1577 m     | 1581 s   | $\nu \text{ring} + \text{Ar-OCH}_3 \text{ (MeBH} + \text{oVa)}$                                  | 1575 w  | 1564 m  | 1661         | $\nu \text{ring oVa}$                                                                        |
|            |          |                                                                                                  |         |         | 1589         | $(\nu \text{ring} + \nu \text{Ar-OCH}_3) \text{ oVa}$                                        |
|            |          |                                                                                                  | 1538 m  | 1543 sh | 1648         | $\nu \text{C=O} + \nu \text{ring MeBH}$                                                      |
| 1514 m     | 1518 vw  | $\nu \text{ring} + \text{Ar-C (MeBH)}$                                                           | 1512 m  | 1516 w  | 1606         | $\nu \text{ring MeBH} + \nu \text{coord ring}$                                               |
| 1476 m     | 1485 m-w | $\nu \text{C-NH} + \nu \text{ring} + \nu \text{Ar-OCH}_3 \text{ (oVa)}$                          |         | 1494 w  | 1550         | $\text{C-NH} + \text{Ar-OCH}_3 \text{ MeBH} + \delta \text{NH}$                              |
| 1460 sh    | 1473 sh  | $\nu \text{ring} + \nu \text{Ar-C (oVa)} + \nu \text{Ar-OH} + \delta \text{as CH}_3 \text{ oVa}$ | 1468 w  |         | 1519<br>1517 | $\delta \text{as CH}_3 \text{ oVa}$<br>$\delta \text{as CH}_3 \text{ MeBH}$                  |
| 1440 vw    | 1449 vw  | $\nu \text{ring} + \delta \text{sim CH}_3 \text{ oVa} + \nu \text{C-NH} + \delta \text{NH}$      | 1434 m  | 1435 w  | 1506         | $(\nu \text{ring} + \delta \text{sim CH}_3) \text{ oVa} + \delta \text{NH}$                  |
| 1419 vw    |          | $\delta \text{as CH}_3 \text{ (MeBH)}$                                                           | 1424 sh |         | 1505         | $\delta \text{as CH}_3 \text{ MeBH}$                                                         |
| 1398 vw    | 1389 vw  | $\delta \text{as CH}_3 \text{ oVa}$                                                              |         |         | 1501         | $\delta \text{as CH}_3 \text{ oVa}$                                                          |
| 1371 m     | 1369 vvw | $\delta \text{OH}$                                                                               |         |         |              |                                                                                              |
|            |          |                                                                                                  | 1384 vs | 1390 m  | 1473         | $\nu \text{ring (oVa)} + \nu \text{Ar-O (oVa)}$<br>$\text{coord ring} + \nu_3 \text{NO}_3^-$ |
| 1337 sh    | 1344     |                                                                                                  | 1335 sh | 1332 w  | 1369         | $(\delta \text{CH} + \nu \text{ring}) \text{ oVa} + \delta \text{C8H}$                       |
| 1327 m     | 1327 m   | $\nu \text{ring (oVa)} + \nu \text{Ar-OH}$                                                       | 1319 sh |         | 1366         | $\delta \text{NH} + \delta \text{C8H} + \nu \text{ring (MeBH)}$                              |
| 1315 m     | 1320 sh  | $\delta \text{CH} + \nu \text{as N-C(O)-C} + \nu \text{OH}$                                      | 1304 w  | 1308 vw | 1298         | $\delta \text{C8H} + \nu \text{Ar-C MeBH}$                                                   |

|                   |                   |                                                 |                  |         |      |                                          |
|-------------------|-------------------|-------------------------------------------------|------------------|---------|------|------------------------------------------|
| 1296 m            | 1300 m            | (v C-OCH <sub>3</sub> + v ring) MeBH            | 1272 mw          |         | 1310 | (v C-OCH <sub>3</sub> + v ring) MeBH     |
|                   | 1268 sh           |                                                 |                  |         |      |                                          |
| 1252 s            | 1259 w<br>1235 w  | (v C-OCH <sub>3</sub> + δ ring) oVA             | 1247 m           |         | 1284 | (v C-OCH <sub>3</sub> + δ ring) oVA      |
| 1182 m            | 1186 w            | v ring + v Ar-OCH <sub>3</sub> (oVa)            |                  |         |      |                                          |
| 1124 sh           | 1130 vw           | δ C8H + v ring (oVa)                            | 1217 s           |         | 1243 | δ C8H + v ring (oVa)                     |
| 1150 w            |                   | ρ <sub>r</sub> CH <sub>3</sub> + δ CH (oVa)     |                  |         | 1221 | ρ <sub>r</sub> CH <sub>3</sub> oVa       |
|                   |                   |                                                 |                  |         | 1212 | ρ <sub>r</sub> CH <sub>3</sub> MeBH      |
| 1168 w            | 1161 w            | v N-N + δ CH + v <sub>as</sub> NNC              | 1186 w           | 1192 sh | 1158 | v N-N +- δ CH (rings)                    |
|                   |                   |                                                 | 1177 w           | 1179 w  | 1140 | v N-N +- δ CH MeBH                       |
| 1122 w            | 1220 vw           | δ CH (MeBH)                                     |                  |         |      |                                          |
| 1106 sh<br>1098 w | 1111 sh<br>1103 w | v C-O(OCH <sub>3</sub> ) + δ ring breath (MeBH) | 1125 w           | 1111 vw | 1070 | (v C-O(OCH <sub>3</sub> ) + δ ring) MeBH |
| 1080 w            | 1087 w            | v C-O(OCH <sub>3</sub> ) + δ ring (oVa)         | 1083 w           |         | 1118 | (v C-O(OCH <sub>3</sub> ) + δ ring) oVa  |
| 1065 m            | 1066 vvw          |                                                 |                  |         |      |                                          |
|                   |                   |                                                 | 1036 sh          | 1043 w  | 1001 | (v C-O(OCH <sub>3</sub> ) + δ ring) oVa  |
| 1035 m            | 1038 vw           | δ ring (MeBH)                                   | 1023 m           |         |      | δ ring MeBH                              |
| 967 m<br>958 w    |                   | γ CH + γ <sub>ring</sub> (MeBH)                 | 977 w<br>972 sh  | 981 vvw | 989  | γ CH MeBH                                |
| 893 m             | 899 w             | γ CH (oVa)                                      | 906 w<br>885 vvw |         | 956  | γ C8H + ring (oVa)                       |
| 893 m             | 899 w             | γ CH (oVa)                                      | 856 sh           |         | 875  | γ C8H + ring (oVa)                       |
| 850 s             |                   | γ CH (MeBH)                                     | 846 m            |         | 863  | γ CH MeBH                                |
| 836 m             | 839 w             | γ OH                                            |                  |         |      |                                          |
| 794 w<br>760 w    | 768 vw            | γ CH + γ ring + γ CO (MeBH)                     |                  |         |      |                                          |
| 736 s             |                   | γ CH + δ ring (oVa)                             | 743 m            |         | 870  | δ ring oVA                               |
|                   |                   |                                                 |                  |         | 814  | δ ring MeBH                              |
| 680 w             | 680 vw            | δ N-N-C + γ C8H                                 | 648 w            | 644 vvw | 916  | δ coord. ring                            |
| 610 m             |                   | γ NH                                            | 625 m            | 625     | 482  | γ NH                                     |

|        |        |                                                    |           |     |                                                   |
|--------|--------|----------------------------------------------------|-----------|-----|---------------------------------------------------|
|        |        |                                                    |           | vvw |                                                   |
|        |        |                                                    | 546 vw    |     | 570/541 v Cu-O                                    |
| 472 vw | 476 vw | $\gamma$ NH                                        | 482 vw    |     | $\gamma$ NH                                       |
|        |        |                                                    | 436 vw, b |     | $\gamma$ NH + v N-Cu                              |
| 418 vw |        | $\delta$ Ar-O-CH <sub>3</sub> + $\delta$ C(O)-NH-N | 416 vw    |     | $\delta$ Ar-OCH <sub>3</sub> + $\delta$ C(O)-NH-N |

Calculated frequencies are not scaled. vs: very strong; s: strong; m: medium; w: weak; vw: very weak; vv: very,very weak; sh: shoulder. v: stretching;  $\delta$ : in-plane deformation;  $\gamma$ : out-of-plane deformation; pr: rocking. coord.ring = N-N-C=O-Cu

**Table S7.** Electronic absorption spectra of  $3 \times 10^{-5}$  M methanolic solution of the ligand and Cu complex. Results from TD-DFT are also shown. Percentage contributions of calculated transitions are given in parentheses. Absorption maxima are given in nm. Oscillator strengths, shown in parenthesis, are in a.u.

| H <sub>2</sub> L | [Cu(HL)(H <sub>2</sub> O) <sub>2</sub> ] <sup>+</sup> |              |                                                                              |                                                             |
|------------------|-------------------------------------------------------|--------------|------------------------------------------------------------------------------|-------------------------------------------------------------|
| Experimental     | Experimental                                          | Calculated   | Assignment                                                                   |                                                             |
|                  |                                                       |              | HOMO-1→LUMO+5 (24%)<br>HOMO-1→LUMO+6 (16%)<br>251 (0.1246) HOMO→LUMO+6 (13%) | Intra-ligand transition                                     |
| 220              | 230 sh (1.95x10 <sup>5</sup> )                        | 256 (0.0804) | HOMO-6→LUMO+1 (12%)<br>HOMO-4→LUMO+1 (47%)                                   | Intra-ligand transition                                     |
| 260 sh           | 290 sh (1.11x10 <sup>5</sup> )                        | 279 (0.1612) | HOMO-7→LUMO (45%)<br>HOMO-6→LUMO (26%)<br>HOMO-4→LUMO (11%)                  | Intra-ligand transition<br>Charge transfer transition (L→M) |
| 310              |                                                       |              | HOMO-7→LUMO (34%)<br>HOMO-6→LUMO (19%)                                       | Intra-ligand transition                                     |
| 330 sh           | 322 (1.20x10 <sup>5</sup> )                           | 306 (0.2182) | HOMO-4→LUMO (34%)                                                            | Charge transfer transition (L→M)                            |
|                  | 402 (1.22x10 <sup>5</sup> )                           | 334 (0.1389) | HOMO-2→LUMO (16%)<br>HOMO-1→LUMO+1 (56%)                                     | Charge transfer transition (L→M)                            |



|  |              |              |                                        |                                     |
|--|--------------|--------------|----------------------------------------|-------------------------------------|
|  |              | 340 (0.4314) | HOMO→LUMO+1 (20%)<br>HOMO-2→LUMO (77%) | Charge transfer transition<br>(L→M) |
|  | 710* (125.9) | 532 (0.0039) | HOMO→LUMO (27%)                        | d → d                               |

(L→M): Ligand to Metal

\*found using a more concentrated solution of the complex ( $1 \times 10^{-3} \text{M}$ ).

**Figure S1.** Drawings of Molecular orbitals most involved in electronic transitions.

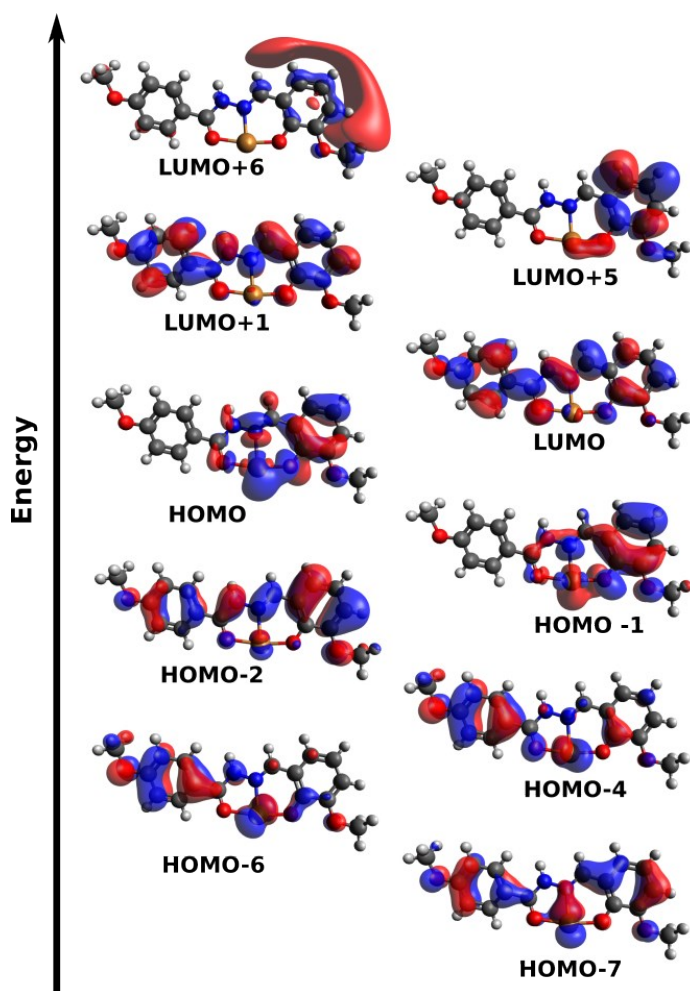

**Figure S2.** Root-mean-square deviation (RMSD) of dodecamer (blue line) and **CuHL** complex (red line) versus the dynamics simulation time.

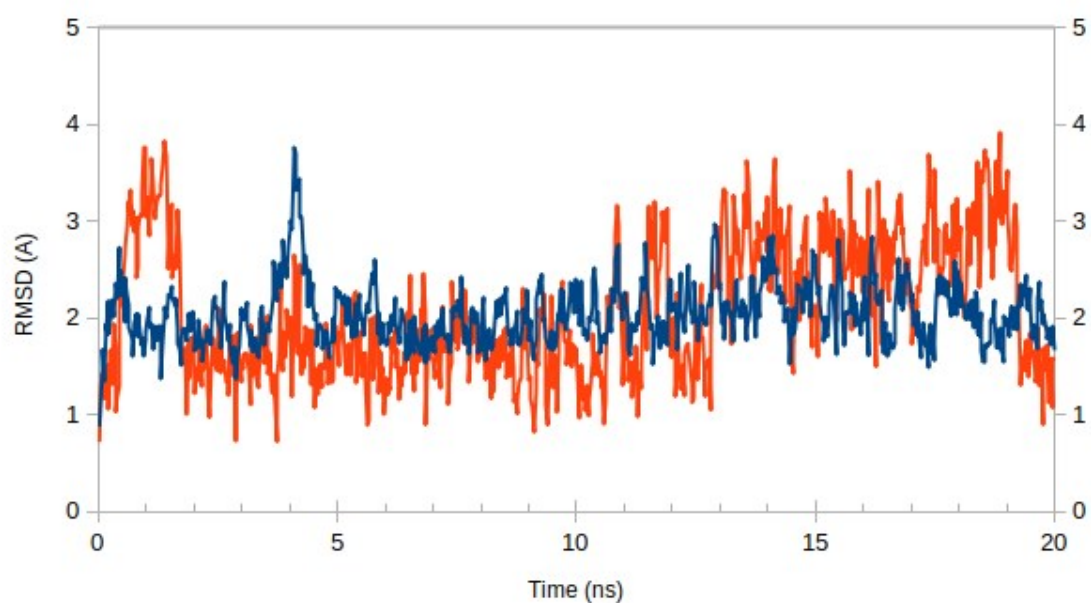

**Figure S3.** Energy decomposition of **CuHL** with nucleotides, based on molecular dynamics trajectory and using MM/GBSA model: total energy (green), interaction with Cu(II) (red) and interaction with the ligand (yellow). The original 1BNA PDB numbering was respected.

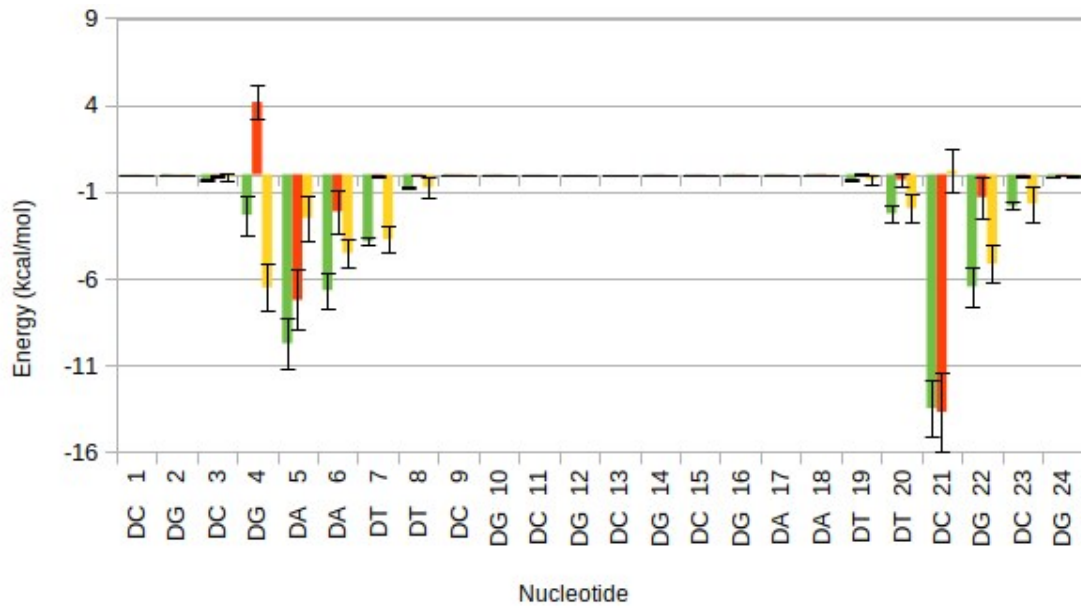

**Figure S4** Apoptosis assay. The plots are representative of three independent experiments.

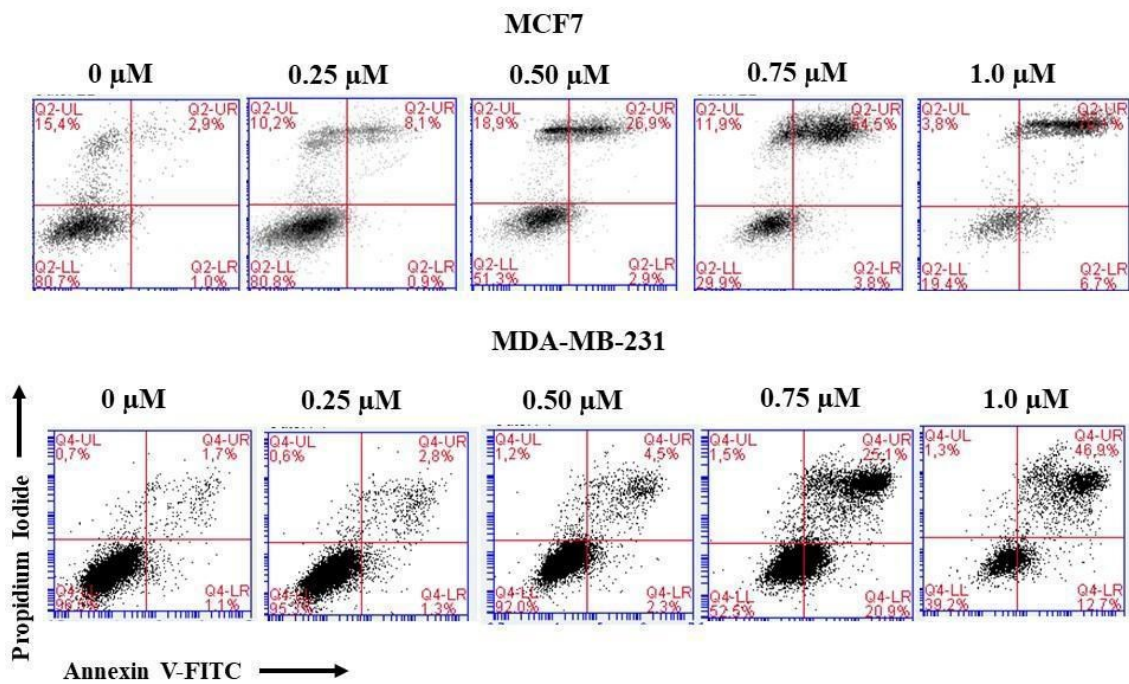

**Figure S5** Cancer Stem Cell studies. The plots are representative of three independent experiments.

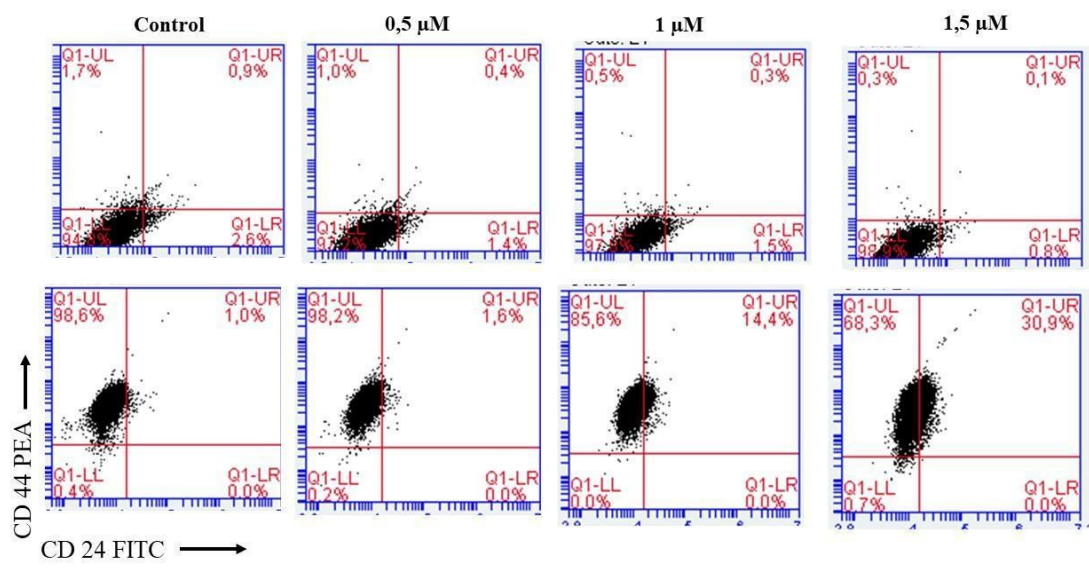

Supplement: d1dt00869b1.pdf [file d1dt00869b1.pdf]
